# Supplementary material
Source: Research Square preprint supplement (doi:10.21203/rs.3.rs-8822816/v1)
Supplement: Supplementary file 1 [file 5bd38694cb80b2205e38baf4.docx]

**Supplementary Table 1.**

International Classification of Disease (ICD10) codes for complicated and uncomplicated HZ.

| **B02 Herpes zoster** | |
| --- | --- |
| **B02.0** | **Encephalitis related to HZ** |
| **B02.1** | **Meningitis related to herpes zoster** |
| **B02.2** | **Other nervous system complications** |
| B02.21 | Postherpetic geniculate ganglionitis |
| B02.22 | Postherpetic trigeminal neuralgia |
| B02.23 | Postherpetic polyneuropathy |
| B02.24 | Postherpetic myelitis |
| B02.29 | Other postherpetic nervous system complication |
| **B02.3** | **Ophthalmic complications** |
| B02.30 | Unspecified ophthalmic complication |
| B02.31 | Conjunctivitis |
| B02.32 | Iridocyclitis |
| B02.33 | Keratitis |
| B02.34 | Scleritis |
| B02.39 | Other ophthalmic complications |
| **B02.7** | **Disseminated HZ** |
| **B02.8** | **HZ with an unspecified complication** |
| **B02.9** | **Uncomplicated HZ** |

International Classification of Disease (ICD9) codes for complicated and uncomplicated HZ.

| **053 Herpes zoster** | |
| --- | --- |
| **053.0** | **Meningitis related to herpes zoster** |
| **053.1** | **Other nervous system complications** |
| 053.10 | Other nervous system unspecified complications |
| 053.11 | Postherpetic geniculate ganglionitis |
| 053.12 | Postherpetic trigeminal neuralgia |
| 053.13 | Postherpetic polyneuropathy |
| 053.14 | Postherpetic myelitis |
| 053.19 | Other postherpetic nervous system complication |
| **053.2** | **Ophthalmic complications** |
| 053.20 | Eyelid dermatitis/Ophthalmic HZ |
| 053.21 | Kerato-conjunctivitis |
| 053.22 | Iridocyclitis |
| 053.29 | Other ophthalmic complications |
| **053.7** | **HZ with specific complication** |
| 053.71 | HZ External Otitis |
| 053.79 | Other |
| **053.8** | **HZ with an unspecified complication** |
| **053.9** | **Uncomplicated HZ** |
